# Supplementary material
Source: HighWire-hosted journal article supplement (https://jnm.snmjournals.org/highwire/filestream/94326/field_highwire_adjunct_files/0/95299_Supplemental_Data.pdf)
Supplement: 95299_Supplemental_Data.pdf [file 95299_Supplemental_Data.pdf]

**Supplemental TABLE 1.** Required Relative and Absolute Differences to Exceed Test-retest

Variability\*

|                               | Relative difference | Absolute difference |
|-------------------------------|---------------------|---------------------|
| SUV <sub>max</sub>            | 15%                 | 3.2                 |
|                               | 20%                 | 1.6                 |
|                               | 25%                 | 0.9                 |
| SUV <sub>mean</sub> H,N,M,W,V | 10%                 | 1.21                |
|                               | 15%                 | 0.77                |
|                               | 20%                 | 0.55                |
| SUV <sub>mean</sub> H,N*,W    | 10%                 | 0.93                |
|                               | 15%                 | 0.62                |
|                               | 20%                 | 0.48                |

\* Listed are the relative and absolute differences required for a difference to have less than 5% probability of being due to measurement error, when comparing a single PET observation to a fixed value. Differences have to exceed both the relative and absolute thresholds.

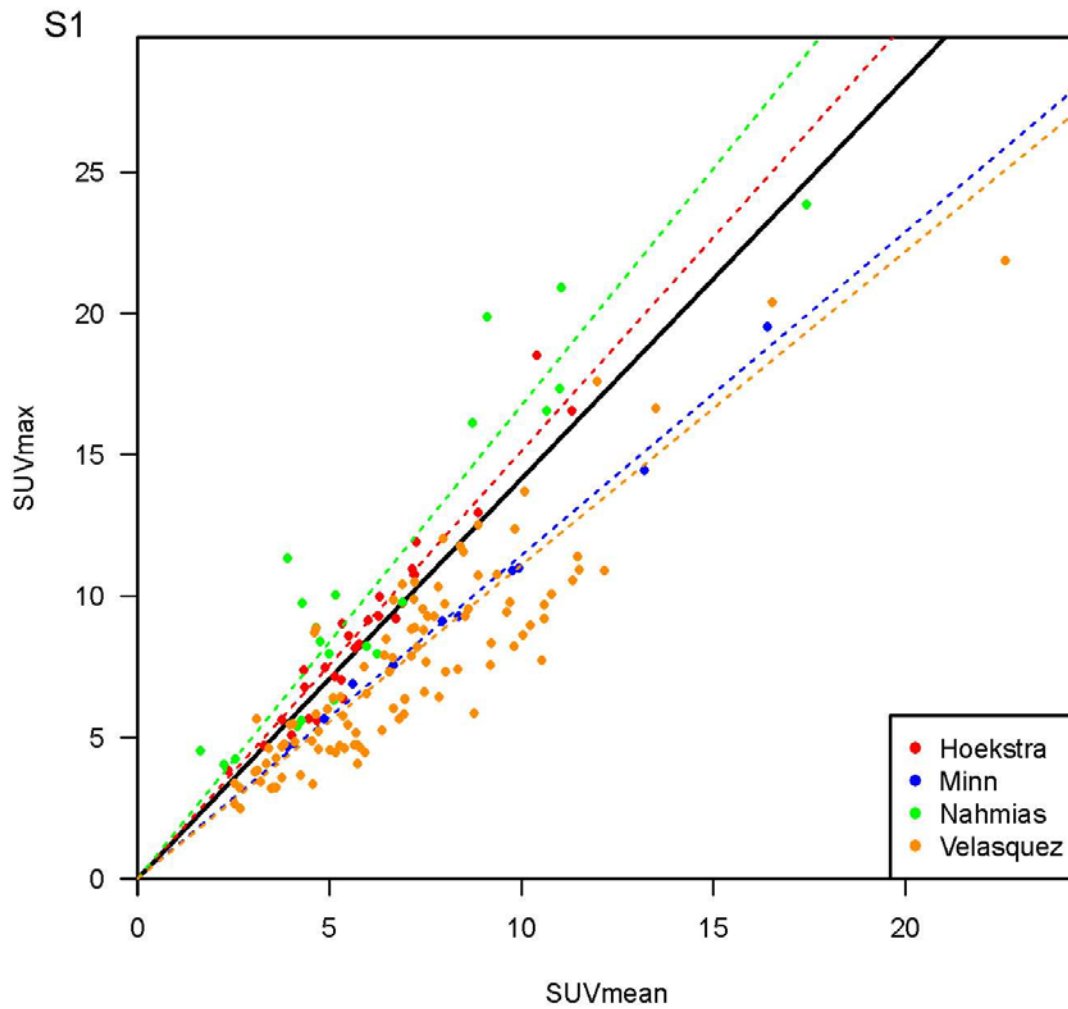

**Supplemental FIGURE 1.** A comparison of published study-specific first principal components (dashed lines) with the first principal component calculated from pooled data (black solid line).

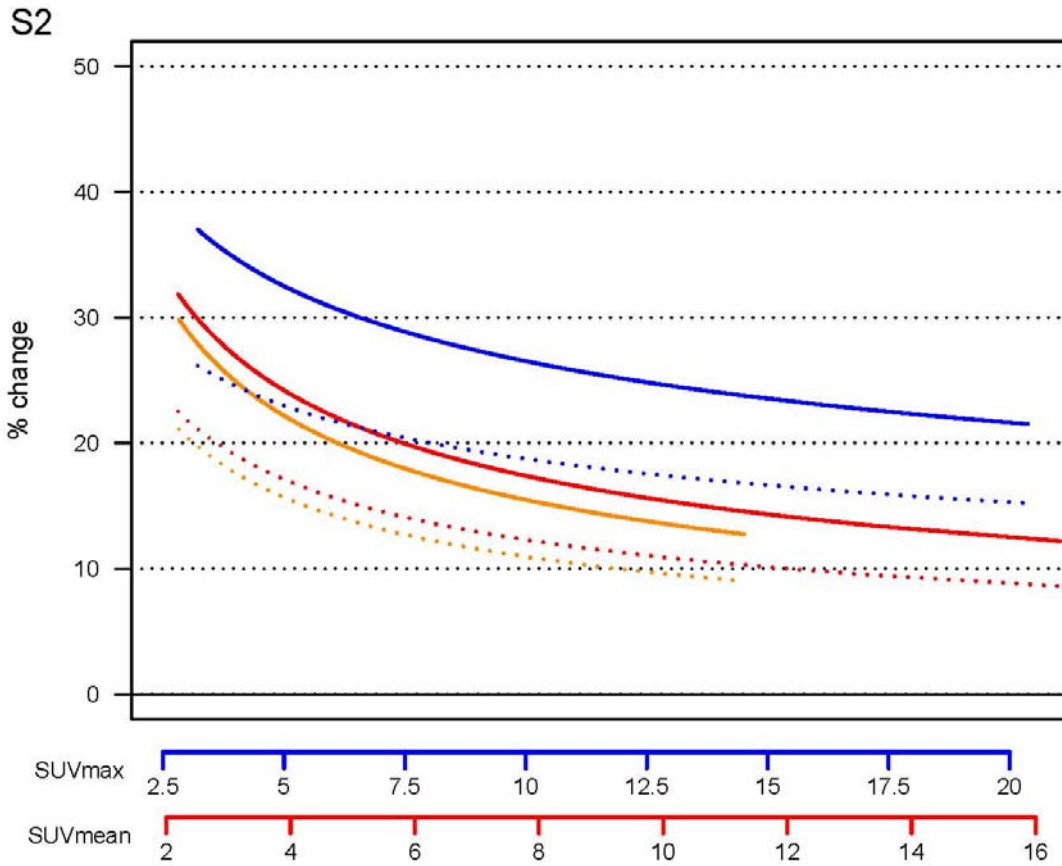

**Supplemental FIGURE 2.** A comparison of CR95s (i.e. mean-variance relations) for  $SUV_{max}$  (blue),  $SUV_{mean}$  (all data; red) and  $SUV_{mean}$  (50% isocontour; orange). The scales are matched via the first principle component (Figure S1). Solid lines represent the test-retest CR95s, while the dotted lines are the one observation CR95s (i.e. variance divided by  $\sqrt{2}$ ).

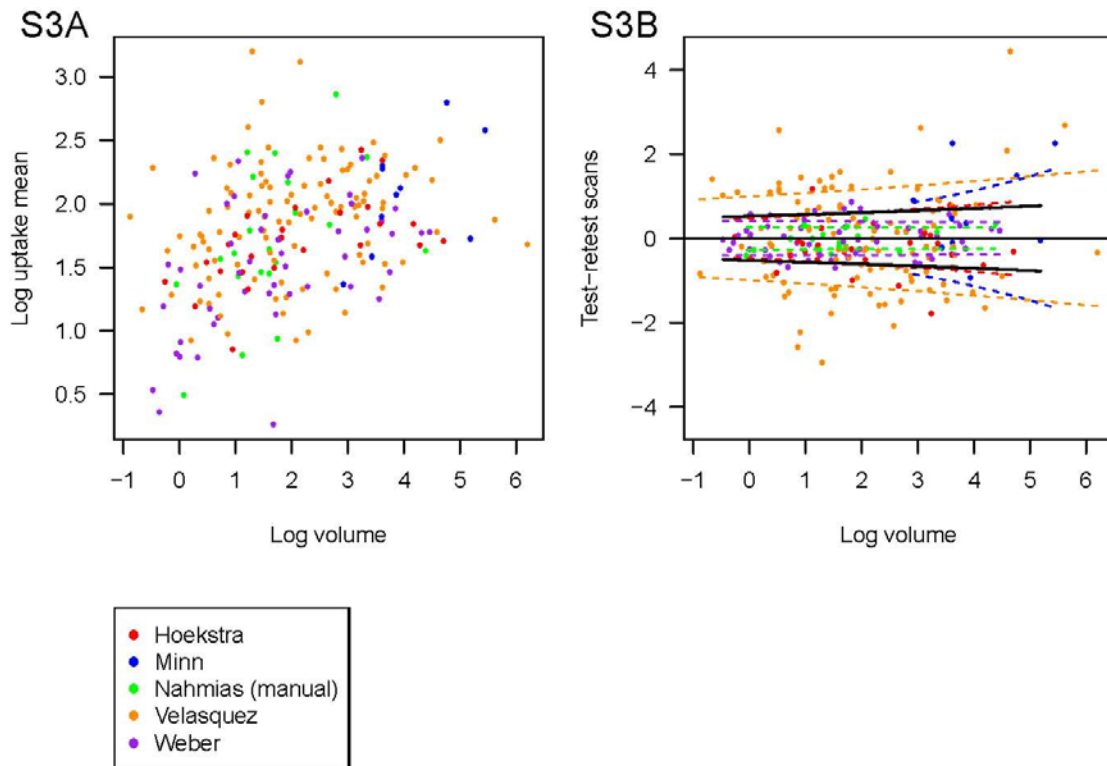

**Supplemental FIGURE 3.**  $SUV_{mean}$  repeatability with respect to tumor volume. (A) The log of the tumor uptake plotted against the log of the tumor volume. (B) The estimated published study-specific standard deviations (dashed lines) and the model fit with published study as a random factor (solid line).
